# Supplementary material for: 369 ホットラン冷却制御システムの開発 : ホットストリップミルにおけるホットラン冷却制御技術の開発(第 2 報)(薄板熱延・薄板冷延, 加工・システム・利用技術, 日本鉄鋼協会第 110 回講演大会)
Source: Royal Society of Chemistry journal article supplement (doi:10.1039/c8nr07294a), 1985-09-05
Supplement: c8nr07294a1.pdf [file c8nr07294a1.pdf]

## Supporting Information

### DNA flower-encapsulated horseradish peroxidase with enhanced biocatalytic activity synthesized by an isothermal one-pot method based on rolling circle amplification

Yongcun Yan,<sup>a</sup> Juan Li,<sup>a</sup> Wenhui Li,<sup>a</sup> Ye Wang,<sup>c</sup> Weiling Song,<sup>b</sup> Sai Bi<sup>\*a</sup>

<sup>a</sup>College of Chemistry and Chemical Engineering, Shandong Demonstration Center for Experimental Chemistry Education, Qingdao University, Qingdao 266071, P. R. China

<sup>b</sup>Laboratory of Optic-electric Sensing and Analytical Chemistry for Life Science, MOE; Shandong Key Laboratory of Biochemical Analysis; Key Laboratory of Analytical Chemistry for Life Science in Universities of Shandong; College of Chemistry and Molecular Engineering, Qingdao University of Science and Technology, Qingdao 266042, P. R. China

<sup>c</sup>Clinical Laboratory, Qingdao Central Hospital, The Second Affiliated Hospital of Medical College of Qingdao University, Qingdao 266042, P. R. China

\*Corresponding author. E-mail: bisai11@126.com.

## Additional experimental section

**Chemicals and materials.** T4 DNA ligase, exonuclease I (Exo I), phi29 DNA polymerase, 2,2'-azino-bis(3-ethylbenzothiazoline)-6-sulfonate diammonium salt (ABTS), 2-(N-morpholino)ethanesulfonic acid (MES) and 4S Red Plus solution were purchased from BBI Life Sciences Co., Ltd. (Shanghai, China). Bradford protein assay kit and deoxynucleotides (dNTPs) were purchased from Sangon Biotechnology Co., Ltd. (Shanghai, China). Horseradish peroxidase (HRP), hydrogen peroxide (H<sub>2</sub>O<sub>2</sub>), hydrochloric acid (HCl), silver nitrate (AgNO<sub>3</sub>), chloroauric acid tetrahydrate (HAuCl<sub>4</sub>·4H<sub>2</sub>O), cetyltrimethylammonium bromide (CTAB), sodium borohydride (NaBH<sub>4</sub>) and L-ascorbic acid (AA) were provided by Sinopharm Chemical Reagent Co., Ltd. (Shanghai, China). 1-ethyl-(3-3'-dimethylaminopropyl) carbodiimide (EDC) and N-hydroxysuccinimide (NHS) were ordered from Aladdin Reagent Co., Ltd. (Shanghai, China). Thrombin was provided by Macklin Biochemical Co., Ltd. (Shanghai, China). The oligonucleotides used in this work were synthesized and HPLC-purified by Sangon Biotechnology Co., Ltd. (Shanghai, China), and the sequences are listed in Table S1. PicoGreen dsDNA reagent was purchased from Yeasen Biotech Co., Ltd. (Shanghai, China). Carboxyl-modified magnetic microparticles (MMPs) (3~4 μm, 0.5% W/V) were obtained from BaseLine ChromTech Research Centre (Tianjin, China). All reagents were of analytical grade and used without further purification. Nuclease-free ultrapure water was used in the whole experiments.

**Table S1.** Sequences of oligonucleotides used in this work

| Name          | Sequences (5'-3') <sup>a</sup>                                                                              |
|---------------|-------------------------------------------------------------------------------------------------------------|
| padlock probe | phosphate-<br><u>AATATTATTCCAGCTGGCAGTCACCCCAACCTGCC</u><br><u>CTACCACGGACTGACTGCACCTTGAACGCTTATTATGATT</u> |
| primer        | <u>CTGGAATAATATT</u> AATCATAATAAGC                                                                          |
| Apt15         | GGT TGG TGT GGT TGG-NH <sub>2</sub>                                                                         |

<sup>a</sup> The underlined sequence in padlock probe is complementary to the sequence of Apt29.

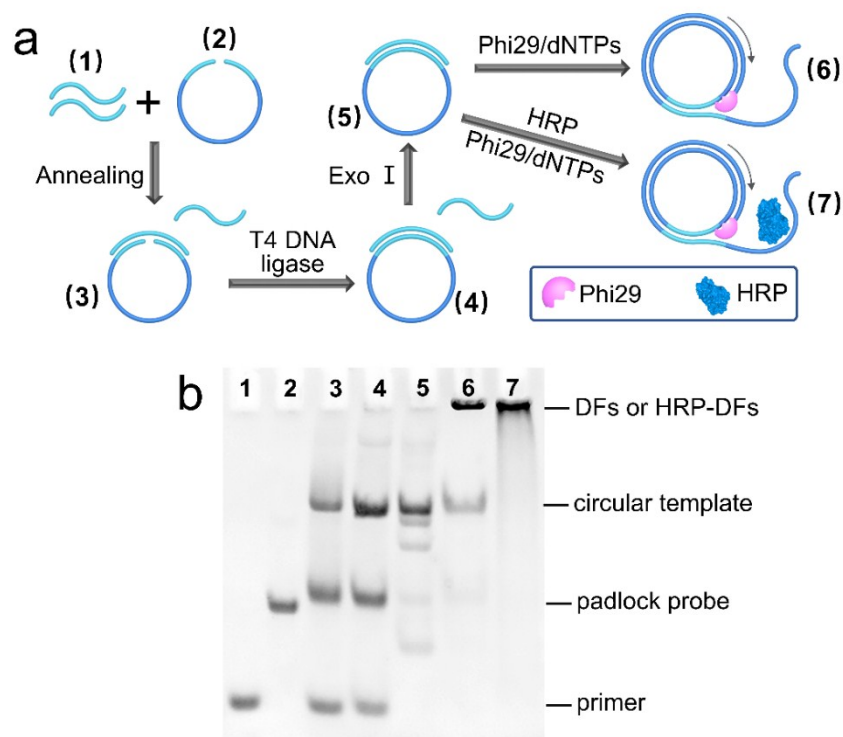

**Fig. S1** Non-denaturing PAGE characterization. (a) Schematic illustration of circular template preparation for RCA reaction in the absence and presence of HRP. (b) Non-denaturing PAGE image. Lane 1: primer, lane 2: padlock probe, lane 3: padlock probe/primer hybrid after annealing, lane 4: sample in lane 3 treated with T4 DNA ligase, lane 5: sample in lane 4 treated with Exo I, lane 6: DFs, and lane 7: HRP-DFs.

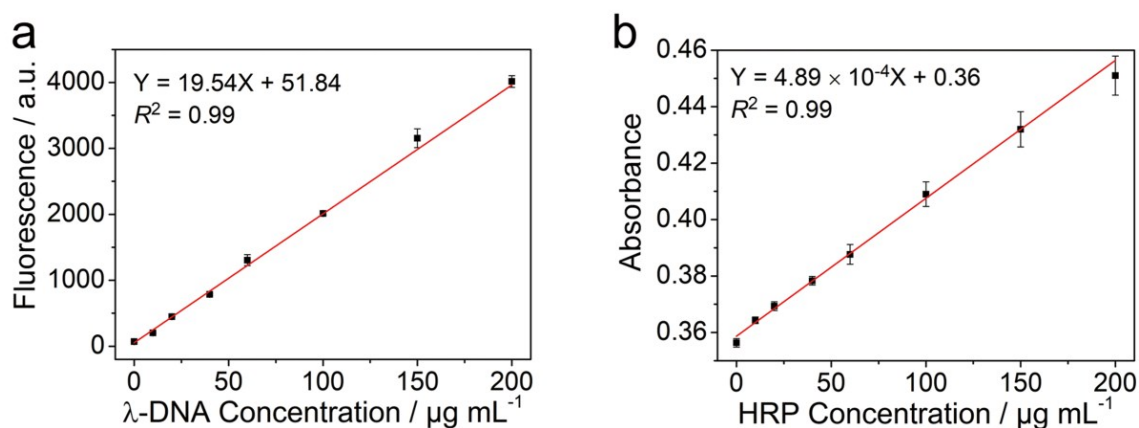

**Fig. S2** Standard curves of (a) DNA measured by  $\lambda$ -DNA and (b) protein measured by HRP. The curves are obtained from three independent measurements.

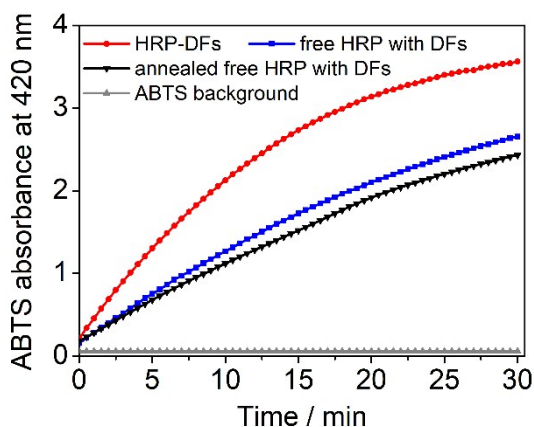

**Fig. S3** Dynamic UV-vis absorbance of ABTS at 420 nm catalyzed by HRP-DFs, free HRP with DFs, and annealed free HRP with DFs.

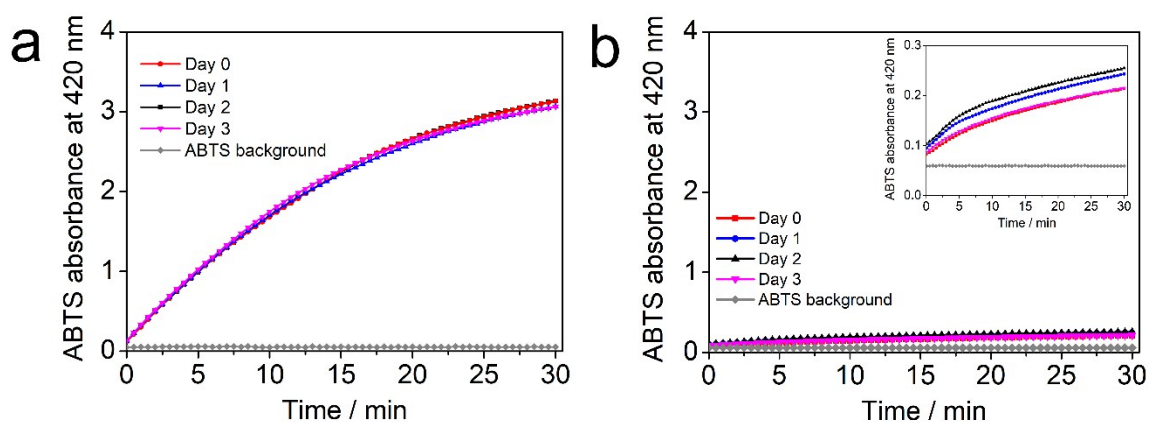

**Fig. S4** Dynamic UV-vis absorbance of ABTS at 420 nm catalyzed by (a) HRP-DFs and (b) supernatant of HRP-DFs on different days.

**Table S2** Recovery of thrombin detected in diluted human serum samples by the proposed aptasensor

| sample | added (fM) | founded (fM)   | recovery (%)   | RSD (%) <sup>b</sup> |
|--------|------------|----------------|----------------|----------------------|
| 1      | 0          | — <sup>a</sup> | — <sup>a</sup> | — <sup>a</sup>       |
| 2      | 10         | 9.83           | 98.3           | 6.0                  |
| 3      | 50         | 49.42          | 98.8           | 2.9                  |
| 4      | 70         | 69.74          | 99.6           | 3.9                  |

<sup>a</sup> “—” denotes that the concentration of the analyte is too low to be detected.

<sup>b</sup> The results are obtained from five independent experiments.

**Table S3** Comparison of the proposed assay with other methods for thrombin detection

| Strategy                                                                                        | Detection technique               | Linear range    | LOD      | Ref.         |
|-------------------------------------------------------------------------------------------------|-----------------------------------|-----------------|----------|--------------|
| Magnetic force assisted aptamer-antibody sandwich assay                                         | Electrochemistry                  | 1 nM-500 nM     | 0.49 nM  | <sup>1</sup> |
| HCR and DNA triplex assembly                                                                    | Fluorescence                      | 0.5 nM-200 nM   | 0.32 nM  | <sup>2</sup> |
| Molecular machine powered surface programmatic chain reaction                                   | Electrochemistry                  | 2 pM-20 nM      | 0.76 pM  | <sup>3</sup> |
| $\gamma$ -Cys-hemin/G-quadruplex-based self-catalytic platform                                  | Electrochemistry                  | 0.1 pM-80 nM    | 0.032 pM | <sup>4</sup> |
| HCR-mediated assembly of bioluminescent modules and self-illumination-based BRET                | Bioluminescence                   | 14.4 pM-9 nM    | 12.8 pM  | <sup>5</sup> |
| TSDR-mediated proximity binding and recycling amplification                                     | Electrochemistry                  | 0.05 nM-100 nM  | 23.6 pM  | <sup>6</sup> |
| Dual-signaling electrochemical ratiometric amplification and DNA walker recycling amplification | Electrochemistry                  | 0.1 pM-10 pM    | 56 fM    | <sup>7</sup> |
| DNA enzyme/AuNPs-based dual-signal amplification                                                | Photoelectrochemistry             | 87.5 fM-8.75 nM | 17.3 fM  | <sup>8</sup> |
| DNA flower-encapsulated HRP with enhanced biocatalytic activity for etching of AuNRs            | Visual and colorimetric detection | 5 fM-80 fM      | 0.22 fM  | This work    |

HCR, hybridization chain reaction; BRET, bioluminescence resonance energy transfer; TSDR, toehold-mediated strand displacement reaction

## References

1. S. Chung, J. M. Moon, J. Choi, H. Hwang and Y. B. Shim, *Biosens. Bioelectron.*, 2018, **117**, 480-486.
2. L. Zou, T. Li, R. Shen, S. Ren and L. Ling, *Talanta*, 2018, **189**, 137-142.
3. J. Zhu, H. Gan, J. Wu and H. Ju, *Anal. Chem.*, 2018, **90**, 5503-5508.
4. Y. C. Zhou, X. X. Ran, A. Y. Chen, Y. Q. Chai, R. Yuan and Y. Zhuo, *Anal. Chem.*, 2018, **90**, 9109-9116.
5. Y. Li, P. Yang, N. Lei, Y. Ma, Y. Ji, C. Zhu and Y. Wu, *Anal. Chem.*, 2018, **90**, 11495-11502.
6. J. Yang, Y. Wu, C. Gan, R. Yuan and Y. Xiang, *Biosens. Bioelectron.*, 2018, **117**, 743-747.
7. C. Zhu, M. Liu, X. Li, X. Zhang and J. Chen, *Chem. Commun.*, 2018, **54**, 10359-10362.
8. Y. Li, F. Chen, Z. Luan and X. Zhang, *Biosens. Bioelectron.*, 2018, **119**, 63-69.
